# Supplementary material
Source: HighWire-hosted journal article supplement (http://thorax.bmjjournals.com/highwire/filestream/174159/field_highwire_adjunct_files/2/644345webonlyapp3.pdf)
Supplement: 644345webonlyapp3.pdf [file 644345webonlyapp3.pdf]

Supplementary Table 2a: Principal Phenotype, cohort 1

| SNP         | chr | pos   | ref | alt  | freq | OR  | 95% CI | P   | OR   | 95% CI | P     | OR     | 95% CI | P           |      |        |      |             |      |        |      |             |      |        |
|-------------|-----|-------|-----|------|------|-----|--------|-----|------|--------|-------|--------|--------|-------------|------|--------|------|-------------|------|--------|------|-------------|------|--------|
| rs12585759  | 415 | 3.61  | 400 | 0.44 | 0.77 | 376 | 4.51   | 550 | 0.46 | 0.09   | 2.93  | 0.2313 | 0.91   | (0.76-1.09) | 0.09 | 0.3194 | 1.02 | (0.77-1.35) | 0.00 | 0.9464 | 0.76 | (0.55-1.05) | 2.45 | 0.1175 |
| rs181781    | 415 | 5.54  | 302 | 0.10 | 0.62 | 376 | 7.12   | 535 | 0.09 | 0.01   | 1.63  | 0.4419 | 1.11   | (0.81-1.53) | 0.26 | 0.5562 | 0.86 | (0.61-1.21) | 0.44 | 0.4246 | 0.54 | (0.42-0.82) | 0.12 | 0.7238 |
| rs49401     | 415 | 1.45  | 409 | 0.22 | 0.10 | 376 | 3.13   | 558 | 0.22 | 0.19   | 0.26  | 0.8792 | 1.02   | (0.82-1.27) | 0.02 | 0.8834 | 0.58 | (0.74-1.24) | 0.08 | 0.7792 | 0.91 | (0.46-1.8)  | 0.01 | 0.9158 |
| rs147141    | 415 | 9.72  | 412 | 0.18 | 0.13 | 376 | 1.91   | 565 | 0.17 | 0.03   | 1.57  | 0.4852 | 1.04   | (0.82-1.32) | 0.07 | 0.7976 | 0.91 | (0.7-1.2)   | 0.35 | 0.5568 | 0.68 | (0.29-1.6)  | 0.46 | 0.4976 |
| rs2689503   | 415 | 9.64  | 375 | 0.47 | 0.46 | 376 | 9.55   | 521 | 0.43 | 0.01   | 4.87  | 0.0371 | 1.17   | (0.81-1.71) | 0.01 | 0.1136 | 0.73 | (0.53-0.97) | 4.29 | 0.0001 | 0.92 | (0.77-1.46) | 0.06 | 0.8264 |
| rs127121    | 415 | 1.20  | 409 | 0.46 | 0.25 | 376 | 6.58   | 541 | 0.43 | 0.01   | 4.55  | 0.0223 | 1.21   | (1.146)     | 0.02 | 0.9260 | 1.71 | (0.54-6.08) | 0.02 | 0.5577 | 1.11 | (0.54-1.52) | 0.34 | 0.2577 |
| rs273438    | 415 | 2.37  | 401 | 0.21 | 0.16 | 376 | 2.95   | 559 | 0.21 | 0.36   | 0.41  | 0.8143 | 0.96   | (0.77-1.2)  | 0.08 | 0.7832 | 1.02 | (0.79-1.3)  | 0.01 | 0.8320 | 0.79 | (0.36-6.3)  | 0.21 | 0.6446 |
| rs1483149   | 415 | 3.89  | 403 | 0.44 | 0.57 | 376 | 2.26   | 563 | 0.42 | 0.36   | 2.04  | 0.2697 | 2.09   | (0.81-1.3)  | 0.72 | 0.3977 | 0.83 | (0.63-1.08) | 1.62 | 0.023  | 1.01 | (0.72-1.3)  | 0.00 | 0.9466 |
| rs478364    | 415 | 5.32  | 391 | 0.42 | 0.44 | 376 | 5.03   | 547 | 0.43 | 0.68   | 0.40  | 0.8208 | 0.98   | (0.81-1.18) | 0.03 | 0.8016 | 0.99 | (0.75-1.3)  | 0.00 | 0.9751 | 0.91 | (0.84-1.2)  | 0.22 | 0.6399 |
| rs262862    | 415 | 4.82  | 395 | 0.21 | 0.30 | 376 | 8.51   | 527 | 0.20 | 0.72   | 0.45  | 0.8000 | 1.08   | (0.86-1.36) | 0.36 | 0.5475 | 0.91 | (0.7-1.2)   | 0.35 | 0.5542 | 1.15 | (0.58-2.07) | 0.01 | 0.9055 |
| rs262864    | 415 | 6.78  | 385 | 0.22 | 0.83 | 376 | 11.46  | 510 | 0.22 | 0.82   | 0.09  | 0.9592 | 0.97   | (0.77-1.21) | 0.05 | 0.8190 | 1.04 | (0.79-1.36) | 0.03 | 0.8221 | 0.94 | (0.5-1.77)  | 0.00 | 0.9647 |
| rs274748    | 415 | 2.89  | 403 | 0.22 | 0.54 | 376 | 3.65   | 555 | 0.20 | 0.64   | 0.93  | 0.6273 | 1.1    | (0.88-1.38) | 0.02 | 0.4203 | 0.92 | (0.7-1.1)   | 0.34 | 0.5596 | 1.32 | (0.7-2.3)   | 0.48 | 0.4880 |
| rs2397575   | 415 | 7.25  | 381 | 0.48 | 0.58 | 376 | 6.25   | 540 | 0.48 | 0.29   | 0.79  | 0.0799 | 0.99   | (0.85-1.16) | 0.01 | 0.8236 | 0.98 | (0.71-1.27) | 0.09 | 0.7620 | 0.93 | (0.81-1.23) | 0.38 | 0.5818 |
| rs1772544   | 415 | 5.78  | 391 | 0.40 | 0.25 | 376 | 13.02  | 501 | 0.45 | 0.27   | 6.56  | 0.0377 | 0.83   | (0.63-1.0)  | 0.01 | 0.0752 | 1.12 | (0.84-1.46) | 0.01 | 0.4786 | 0.83 | (0.45-6.5)  | 0.12 | 0.1034 |
| rs168986    | 415 | 1.93  | 407 | 0.11 | 0.33 | 376 | 7.81   | 531 | 0.10 | 0.26   | 1.53  | 0.4663 | 1.09   | (0.81-1.47) | 0.24 | 0.6238 | 0.87 | (0.63-1.2)  | 0.54 | 0.4819 | 0.65 | (0.19-1.17) | 0.17 | 0.8786 |
| rs1597572   | 415 | 0.96  | 411 | 0.27 | 0.55 | 376 | 1.39   | 568 | 0.29 | 0.68   | 0.80  | 0.7421 | 0.93   | (0.76-1.13) | 0.46 | 0.4982 | 1.08 | (0.84-1.38) | 0.07 | 0.6023 | 0.82 | (0.53-1.2)  | 0.28 | 0.5987 |
| rs2607838   | 415 | 0.48  | 413 | 0.07 | 0.21 | 376 | 1.22   | 569 | 0.07 | 0.74   | 3.33  | 0.1820 | 1.01   | (0.71-1.43) | 0.00 | 0.9689 | 0.93 | (0.65-1.34) | 0.07 | 0.7668 | 0    | (0-1)       | 1.44 | 0.2302 |
| rs1685490   | 415 | 2.17  | 406 | 0.37 | 0.78 | 376 | 3.65   | 555 | 0.31 | 0.95   | 3.42  | 0.1812 | 0.83   | (0.68-1.01) | 0.16 | 0.0733 | 1.23 | (0.65-2.50) | 2.34 | 0.1281 | 0.72 | (0.44-1.16) | 1.57 | 0.2104 |
| rs2749359   | 415 | 14.70 | 354 | 0.33 | 0.15 | 376 | 15.80  | 485 | 0.37 | 0.00   | 5.73  | 0.0599 | 0.82   | (0.67-1)    | 0.38 | 0.0586 | 1.13 | (0.86-1.49) | 0.05 | 0.4709 | 0.82 | (0.42-0.92) | 0.28 | 0.2016 |
| rs2749349   | 415 | 2.65  | 404 | 0.21 | 0.51 | 376 | 2.60   | 561 | 0.13 | 0.41   | 0.85  | 0.6270 | 1.09   | (0.81-1.49) | 0.43 | 0.0712 | 0.88 | (0.65-1.19) | 0.97 | 0.2491 | 1.02 | (0.72-1.3)  | 0.00 | 0.9528 |
| rs1474701   | 415 | 1.45  | 409 | 0.18 | 0.13 | 376 | 3.85   | 555 | 0.13 | 0.61   | 11.03 | 0.0323 | 1.46   | (1.13-1.87) | 0.02 | 0.0309 | 1.05 | (0.81-1.35) | 0.02 | 0.4308 | 0.98 | (0.39-6.48) | 0.54 | 0.8370 |
| rs2137950   | 415 | 1.28  | 410 | 0.43 | 0.40 | 376 | 2.43   | 562 | 0.43 | 0.46   | 0.87  | 0.5142 | 0.98   | (0.81-1.17) | 0.05 | 0.8206 | 0.96 | (0.73-1.26) | 0.04 | 0.8412 | 0.87 | (0.63-1.2)  | 0.32 | 0.4701 |
| rs1916988   | 415 | 5.33  | 391 | 0.19 | 0.19 | 376 | 5.73   | 543 | 0.20 | 0.47   | 0.89  | 0.7000 | 0.94   | (0.75-1.16) | 0.22 | 0.6397 | 1.05 | (0.8-1.37)  | 0.06 | 0.8004 | 0.87 | (0.53-1.57) | 0.39 | 0.5305 |
| rs2622044   | 415 | 1.99  | 408 | 0.32 | 0.49 | 376 | 3.47   | 556 | 0.31 | 0.72   | 0.83  | 0.6208 | 1.02   | (0.84-1.24) | 0.03 | 0.8023 | 0.93 | (0.72-1.2)  | 0.27 | 0.6050 | 0.98 | (0.8-1.36)  | 0.14 | 0.7088 |
| rs2622057   | 409 | 19.22 | 303 | 0.48 | 0.00 | 361 | 22.46  | 435 | 0.52 | 0.00   | 2.29  | 0.3186 | 0.86   | (0.61-1.05) | 0.20 | 0.1544 | 1.26 | (0.83-1.7)  | 2.04 | 0.1533 | 0.99 | (0.67-1.22) | 0.37 | 0.5442 |
| rs2622057   | 409 | 19.22 | 303 | 0.48 | 0.00 | 374 | 1.92   | 565 | 0.45 | 0.62   | 1.88  | 0.3904 | 0.82   | (0.77-1.1)  | 0.73 | 0.3022 | 1.2  | (0.91-1.58) | 1.54 | 0.2169 | 0.99 | (0.72-1.37) | 0.00 | 0.9804 |
| rs2070727   | 415 | 2.65  | 404 | 0.31 | 0.94 | 376 | 7.29   | 534 | 0.32 | 0.02   | 2.73  | 0.2551 | 0.94   | (0.77-1.14) | 0.37 | 0.5445 | 0.99 | (0.76-1.29) | 0.00 | 0.9902 | 0.73 | (0.48-1.1)  | 1.99 | 0.1587 |
| rs2052966_1 | 415 | 3.78  | 395 | 0.43 | 0.11 | 376 | 8.68   | 526 | 0.41 | 0.44   | 0.85  | 0.6270 | 1.09   | (0.81-1.49) | 0.43 | 0.0712 | 0.87 | (0.65-1.19) | 0.97 | 0.2491 | 1.02 | (0.72-1.3)  | 0.00 | 0.9528 |
| rs1789001   | 415 | 4.54  | 405 | 0.39 | 0.58 | 376 | 3.13   | 558 | 0.41 | 0.28   | 0.14  | 0.8329 | 0.95   | (0.81-1.12) | 0.46 | 0.0323 | 1.12 | (0.85-1.48) | 0.02 | 0.4308 | 0.98 | (0.67-1.2)  | 0.32 | 0.8789 |
| rs2607830   | 415 | 0.97  | 409 | 0.17 | 0.34 | 376 | 1.22   | 569 | 0.16 | 0.97   | 0.58  | 0.9626 | 1.03   | (0.81-1.31) | 0.44 | 0.8463 | 0.86 | (0.73-1.02) | 0.04 | 0.8374 | 1.02 | (0.46-2.25) | 0.02 | 0.8865 |
| rs16743562  | 415 | 0.48  | 413 | 0.44 | 0.28 | 376 | 2.95   | 555 | 0.41 | 0.67   | 2.96  | 0.2797 | 1.15   | (0.96-1.38) | 0.19 | 0.1386 | 0.87 | (0.67-1.14) | 0.87 | 0.3003 | 1.28 | (0.53-1.78) | 2.05 | 0.1520 |
| rs2608912   | 415 | 3.63  | 398 | 0.31 | 0.81 | 376 | 4.51   | 550 | 0.28 | 0.28   | 1.98  | 0.3721 | 1.14   | (0.94-1.39) | 1.60 | 0.2061 | 0.83 | (0.64-1.08) | 1.60 | 0.1823 | 1.12 | (0.72-1.73) | 0.15 | 0.7002 |
| rs3788135   | 415 | 0.72  | 412 | 0.19 | 0.75 | 376 | 2.43   | 562 | 0.21 | 0.82   | 1.33  | 0.5332 | 0.89   | (0.71-1.12) | 0.03 | 0.3360 | 1.11 | (0.85-1.46) | 0.01 | 0.4745 | 0.67 | (0.35-1.30) | 0.74 | 0.3886 |
| rs1685025   | 415 | 1.93  | 407 | 0.18 | 0.17 | 376 | 4.86   | 548 | 0.21 | 0.94   | 2.14  | 0.3343 | 0.85   | (0.67-1.07) | 1.79 | 0.1809 | 1.18 | (0.9-1.54)  | 1.94 | 0.2681 | 0.88 | (0.53-1.34) | 0.95 | 0.3288 |
| rs2609950   | 415 | 18.05 | 338 | 0.08 | 0.11 | 376 | 18.75  | 488 | 0.07 | 0.95   | 1.41  | 0.4920 | 1.13   | (0.79-1.64) | 0.34 | 0.9010 | 0.92 | (0.63-1.37) | 0.08 | 0.7711 | 1.11 | (0.53-0.81) | 0.88 | 0.4096 |
| rs1252686   | 415 | 1.49  | 409 | 0.39 | 0.58 | 376 | 2.83   | 561 | 0.41 | 0.48   | 0.68  | 0.6902 | 1.09   | (0.81-1.49) | 0.43 | 0.0712 | 0.92 | (0.71-1.1)  | 0.97 | 0.2491 | 1.02 | (0.72-1.3)  | 0.00 | 0.9528 |
| rs26251     | 415 | 0.24  | 414 | 0.16 | 0.36 | 376 | 6.77   | 537 | 0.15 | 0.28   | 3.46  | 0.1765 | 1.25   | (0.95-1.65) | 0.24 | 0.0813 | 0.78 | (0.6-1.02)  | 2.75 | 0.0070 | 1.15 | (0.68-2.6)  | 0.87 | 0.4137 |
| rs1684      | 415 | 2.89  | 403 | 0.19 | 0.83 | 368 | 1.06   | 562 | 0.19 | 0.29   | 0.29  | 0.8899 | 1.05   | (0.83-1.32) | 0.12 | 0.7315 | 0.96 | (0.73-1.26) | 0.05 | 0.8305 | 1.22 | (0.57-2.98) | 0.10 | 0.7937 |
| rs2624324   | 415 | 3.15  | 400 | 0.11 | 0.61 | 376 | 3.82   | 554 | 0.10 | 0.29   | 0.19  | 0.9111 | 1.04   | (0.77-1.41) | 0.40 | 0.8402 | 0.96 | (0.7-1.32)  | 0.02 | 0.8008 | 1.30 | (0.28-6.91) | 0.00 | 0.9896 |
| rs2624320   | 415 | 15.18 | 352 | 0.11 | 0.29 | 376 | 6.77   | 537 | 0.10 | 0.17   | 0.01  | 0.8666 | 1.14   | (0.84-1.55) | 0.59 | 0.4419 | 0.87 | (0.62-1.2)  | 0.07 | 0.4808 | 1.53 | (0.21-10.9) | 0.01 | 0.9316 |
| rs2624322   | 415 | 0.45  | 409 | 0.11 | 0.68 | 376 | 2.78   | 560 | 0.13 | 0.92   | 2.39  | 0.3020 | 0.8    | (0.61-1.08) | 2.19 | 0.1392 | 1.27 | (0.93-1.72) | 2.03 | 0.1545 | 0.88 | (0.23-2.01) | 0.19 | 0.6814 |
| rs2624348   | 415 | 1.48  | 413 | 0.08 | 0.48 | 376 | 0.35   | 574 | 0.08 | 0.81   | 0.51  | 0.7742 | 0.91   | (0.65-1.28) | 0.23 | 0.8025 | 1.12 | (0.79-1.6)  | 0.31 | 0.5791 | 1.11 | (0.3-1.1)   | 0.03 | 0.8987 |
| rs2625225   | 415 | 4.82  | 395 | 0.14 | 0.27 | 376 | 5.21   | 546 | 0.11 | 0.45   | 0.99  | 0.9050 | 1.09   | (0.81-1.47) | 0.36 | 0.0909 | 0.71 | (0.53-0.98) | 4.86 | 0.0001 | 0.79 | (0.29-2.3)  | 0.04 | 0.8271 |
| rs2625226   | 415 | 3.61  | 405 | 0.19 | 0.13 | 376 | 6.77   | 537 | 0.12 | 0.34   | 8.87  | 0.0110 | 1.23   | (0.91-1.72) | 0.87 | 0.0491 | 0.85 | (0.63-1.05) | 6.58 | 0.0117 | 0.81 | (0.21-1.9)  | 0.46 | 0.4878 |
| rs1674344   | 415 | 5.06  | 394 | 0.15 | 0.22 | 376 | 5.21   | 546 | 0.12 | 0.83   | 6.34  | 0.0419 | 1.31   | (1.1-1.72)  | 3.62 | 0.0073 | 0.7  | (0.52-0.95) | 5.00 | 0.0054 | 0.77 | (0.28-2.1)  | 0.04 | 0.8468 |
| rs2622784   | 415 | 3.86  | 399 | 0.27 | 0.32 | 376 | 8.16   | 529 | 0.22 | 0.78   | 5.09  | 0.0794 | 1.27   | (1.03-1.58) | 4.85 | 0.0077 | 0.75 | (0.58-0.97) | 4.41 | 0.0056 | 1.4  | (0.82-2.4)  | 1.22 | 0.2702 |
| rs2624308   | 415 | 0.97  | 409 | 0.15 | 0.25 | 376 | 2.08   | 564 | 0.12 | 0.21   | 3.27  | 0.1948 | 1.34   | (1.03-1.73) | 2.82 | 0.0029 | 0.78 | (0.58-1.04) | 2.73 | 0.0087 | 1.66 | (0.5-5.48)  | 0.29 | 0.5904 |
| rs2624370   | 415 | 3.37  | 401 | 0.16 | 0.12 | 376 | 4.69   | 549 | 0.13 | 0.80   | 7.95  | 0.0029 | 1.34   | (1.03-1.73) | 4.58 | 0.0024 | 0.69 | (0.51-0.91) | 6.25 | 0.0124 | 0.82 | (0.3-2.27)  | 0.02 | 0.8970 |

Supplementary Table 2b. Refined Phenotype, cohort 1

| SNP | chr |
|-----|-----|
|-----|-----|
